# Supplementary material
Source: publisher site journal article supplement (https://www.dovepress.com/get_supplementary_file.php?f=229536.docx)
Supplement: Supplementary file 1 [file get_supplementary_file.php]

**Supplementary material**

Questionnaire for patients treated with recombinant human growth hormone (rhGH)

< Visit 1 (Day 1) >

| **Part 1**. The following questions are about the person who gives the answers to this questionnaire. |
| --- |
| 1. For the recent 3 months, who primarily performed the injection of growth hormone therapy to the child?   | ① Child (patient himself/herself) | ② Parent(s) (guardian) | ③ Child and parent(s) (guardian) together | | --- | --- | --- | | ④ Nurse/Doctor | ⑤ Other ( ) | |   2. Who are answering this questionnaire?   | ① Child (patient himself/herself) | ② Parent(s) (guardian) | ③ Child and parent(s) (guardian) together | | --- | --- | --- | | ④ Nurse/Doctor | ⑤ Other ( ) | |   **▶ The person corresponding to the answer to Question No. 1 should answer this questionnaire.**  **In case the injection was performed by the child and the parent(s) (guardian) together, please discuss together to answer the questionnaire.** |
| **Part 2**. The following questions are about the ease of use, preference and tolerability of growth hormone therapy. |
| 1. While you were using the previous growth hormone product (pen/device), how did you feel at each particular step?  At each particular step, ‘Very difficult’ is scored 1 point and ‘Very easy’ 5 points.  Please choose the nearest point you think from 1 to 5 points.   | Injection Step | | Very difficult | A little difficult | Average | A little easy | Very easy | | --- | --- | --- | --- | --- | --- | --- | | Preparation for injection | 1) Replacement of the cartridge when the remaining doses were exhausted | ① | ② | ③ | ④ | ⑤ | | 2) Attaching a needle | ① | ② | ③ | ④ | ⑤ | | 3) Removing air bubbles | ① | ② | ③ | ④ | ⑤ | | Dose setting | 4) Conversion of the prescribed dose to the dose for administration | ① | ② | ③ | ④ | ⑤ | | 5) Setting of an administration dose (Dialing) | ① | ② | ③ | ④ | ⑤ | | 6) Resetting of the dose in case of an incorrect setting during the operation | ① | ② | ③ | ④ | ⑤ | | Injection | 7) Operation of the pen throughout all the procedures including preparation for injection | ① | ② | ③ | ④ | ⑤ | | 8) Injection (Pressing the injection button) | ① | ② | ③ | ④ | ⑤ | | 9) Checking for completion of drug injection | ① | ② | ③ | ④ | ⑤ | | 10) Removing the needle | ① | ② | ③ | ④ | ⑤ | | Aggregate evaluation | 11) Overall ease of use | ① | ② | ③ | ④ | ⑤ |   2. Please choose how long it took to prepare the injection.  ① Less than 2 minutes ② 2 to 5 minutes ③ 5 to 10 minutes ④ More than 10 minutes  3. Did the child feel uncomfortable at the injection site right after the injection?  (For example, warm feeling, redness or swelling at the injection site compared to the surroundings)  ① Very uncomfortable ② A little uncomfortable ③ Average ④ Hardly uncomfortable  ⑤ Not uncomfortable at all  4. Did the child feel pain at the injection site right after the injection? Please choose the nearest one you think.  ① Very painful ② A little painful ③ Average ④ Hardly painful ⑤ Not painful at all  5. Please choose the degree of dread or fear of the needle your child felt at the injection.  ① Very afraid ② A little afraid ③ Average ④ Hardly afraid ⑤ Not afraid at all |

< Visit 2 (Day 57) >

| **Part 1.** The following questions are about the person who gives the answers to this questionnaire. |
| --- |
| 1. Who primarily performed the injection of the disposable pen to the child?   | ① Child (patient himself/herself) | ② Parent(s) (guardian) | ③ Child and parent(s) (guardian) together | | --- | --- | --- | | ④ Nurse/Doctor | ⑤ Other ( ) | |   2. Who are answering this questionnaire?   | ① Child (patient himself/herself) | ② Parent(s) (guardian) | ③ Child and parent(s) (guardian) together | | --- | --- | --- | | ④ Nurse/Doctor | ⑤ Other ( ) | |   **▶ The person corresponding to the answer to Question No. 1 should answer this questionnaire.**  **In case the injection was performed by the child and the parent(s) (guardian) together, please discuss together to answer the questionnaire.**  3. Is the person answering this questionnaire the same as who answered it at the last visit (Visit 1)?  ① Yes ② No ③ Other ( ) |
| **Part 2**. The following questions are about the ease of use, preference and tolerability of growth hormone therapy. |
| 1. While you were using the disposable pen, how did you feel at each injection step?  At each particular step, ‘Very difficult’ is scored 1 point and ‘Very easy’ 5 points.  Please choose the nearest point you think from 1 to 5 points.   | Injection Step | | Very difficult | A little difficult | Average | A little easy | Very easy | | --- | --- | --- | --- | --- | --- | --- | | Preparation for injection | 1) Replacement of the cartridge when the remaining doses were exhausted | ① | ② | ③ | ④ | ⑤ | | 2) Attaching a needle | ① | ② | ③ | ④ | ⑤ | | 3) Removing air bubbles | ① | ② | ③ | ④ | ⑤ | | Dose setting | 4) Conversion of the prescribed dose to the dose for administration | ① | ② | ③ | ④ | ⑤ | | 5) Setting of an administration dose (Dialing) | ① | ② | ③ | ④ | ⑤ | | 6) Resetting of the dose in case of an incorrect setting during the operation | ① | ② | ③ | ④ | ⑤ | | Injection | 7) Operation of the pen throughout all the procedures including preparation for injection | ① | ② | ③ | ④ | ⑤ | | 8) Injection (Pressing the injection button) | ① | ② | ③ | ④ | ⑤ | | 9) Checking for completion of drug injection | ① | ② | ③ | ④ | ⑤ | | 10) Removing the needle | ① | ② | ③ | ④ | ⑤ | | Aggregate evaluation | 11) Overall ease of use | ① | ② | ③ | ④ | ⑤ |   2. Please choose how long it took to prepare the injection.  ① Less than 2 minutes ② 2 to 5 minutes ③ 5 to 10 minutes ④ More than 10 minutes  3. Did the child feel uncomfortable at the injection site right after the injection?  (For example, warm feeling, redness or swelling at the injection site compared to the surroundings)  ① Very uncomfortable ② A little uncomfortable ③ Average ④ Hardly uncomfortable  ⑤ Not uncomfortable at all  4. Did the child feel pain at the injection site right after the injection?  ① Very painful ② A little painful ③ Average ④ Hardly painful ⑤ Not painful at all  5. Please choose the degree of dread or fear of the needle your child felt at the injection.  ① Very afraid ② A little afraid ③ Average ④ Hardly afraid ⑤ Not afraid at all  6. If there were a needle-hider, do you think it would be helpful to ease the dread or fear of the needle?  ① It would not be helpful at all ② It would hardly be helpful ③ Average   1. It would be a little helpful ⑤ It would be very helpful   7. Please score the convenience of **the disposable pen currently in use** compared to the previous growth hormone product (pen/device).  (Please circle (○) the corresponding point.)   | 0 | 1 | 2 | 3 | 4 | | 5 | 6 | | 7 | 8 | 9 | 10 | | --- | --- | --- | --- | --- | --- | --- | --- | --- | --- | --- | --- | --- | |  |  |  |  |  | |  |  | |  |  |  |  | | The disposable pen is **less easy to use**. | | | | | The **Same** | | | The disposable pen is **easier to use**. | | | | |   8. Please choose the growth hormone product (pen/device) you wish to continue to use for the growth hormone therapy. (Do not consider the cost condition when you select.)  ① Disposable pen  ② Previous growth hormone product (pen/device)  ③ Neither is preferred.  9. Please choose the merit of the disposable pen compared to the previous growth hormone product (pen/device), if any.  (**Multiple answers are allowed.**)   | 1. Simple operation (no need for cartridge replacement) | 1. Dose unit expressed in IU | | --- | --- | | 1. Large capacity with a long replacement cycle | 1. Comfortable grip | | 1. Color and design friendly to children | 1. Easy to read the number in the dose display window | | 1. Less pain | 1. Other ( ) | |
